# Supplementary material for: Effect of Time of Girdling on Leaf Photosynthetic Performance and Kiwifruit Quality Characteristics at Harvest and Post-Storage
Source: MDPI journal article supplement (doi:10.3390/app131911087), 2023-10-09
Supplement: s1 [file s1]

## Supplementary Materials

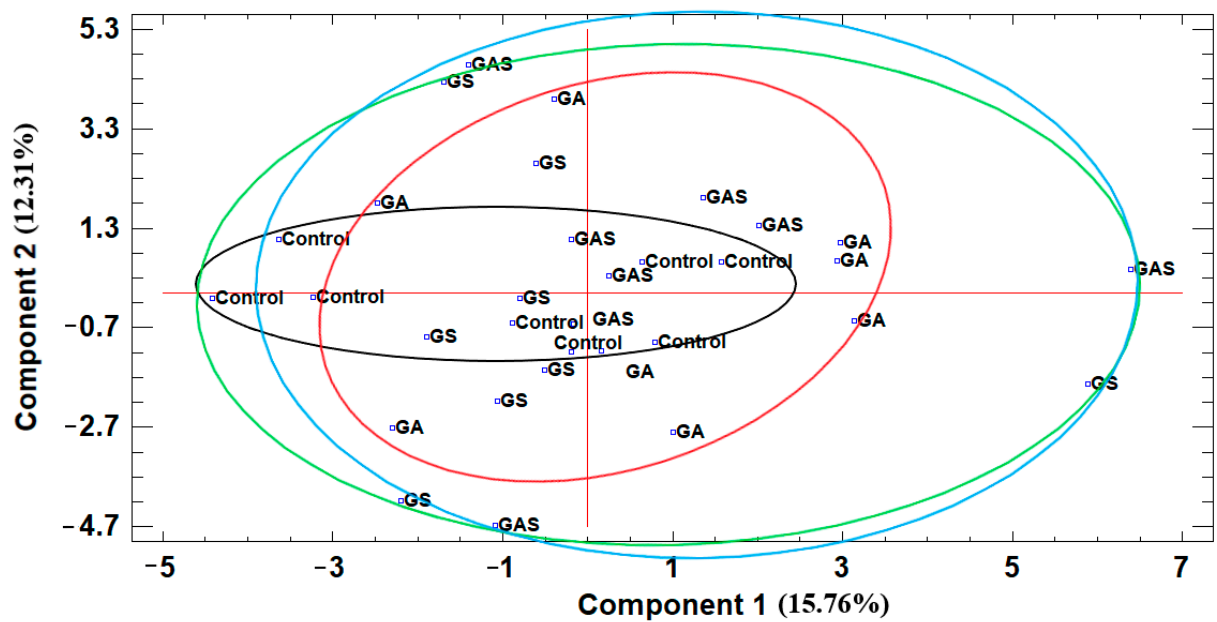

**Figure S1.** Scatterplot of the principal components' weight analysis at harvest. Abbreviations: GA, August girdling, GS, September girdling, GAS, girdling both in August and September. The dark ellipse indicates the control treatment, the red the GA treatment, the green the GS treatment, and the blue the GAS treatment.

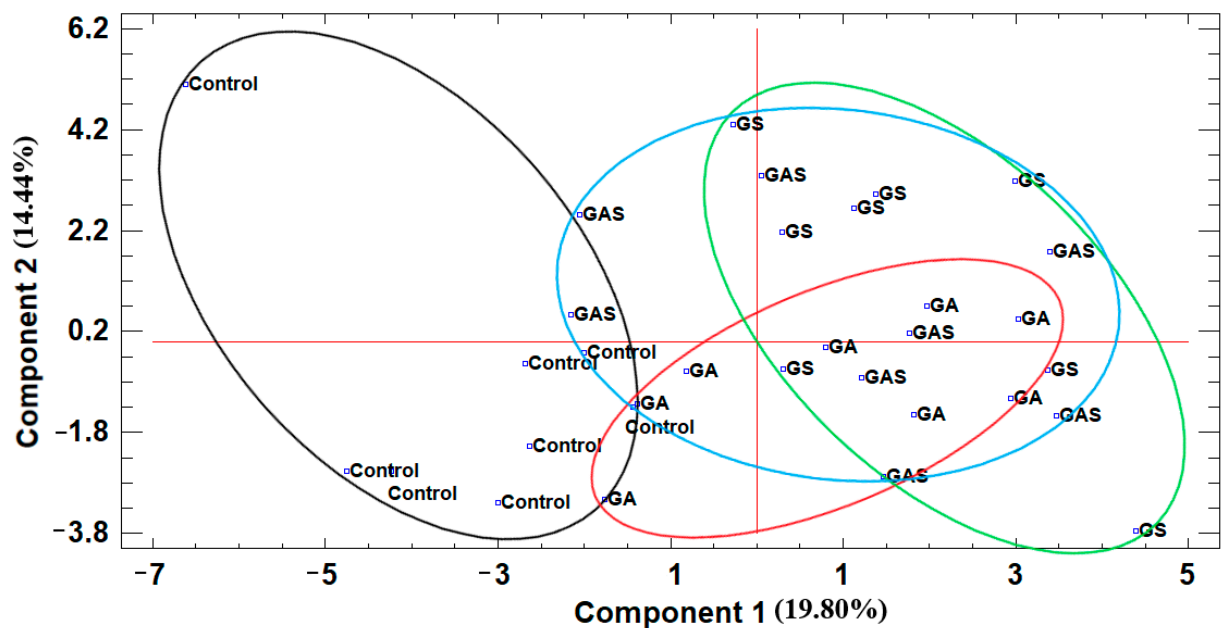

**Figure S2.** Scatterplot of the principal components' weight analysis after storage. Abbreviations: GA, August girdling, GS, September girdling, GAS, girdling both in August and September. The dark ellipse indicates the control treatment, the red the GA treatment, the green the GS treatment, and the blue the GAS treatment.
